# Supplementary material
Source: Springer Nature journal article supplement (https://www.springermedizin.de/resource/supplementary/12936_2008_708_MOESM2_ESM.pdf/9548056)

# Day 0

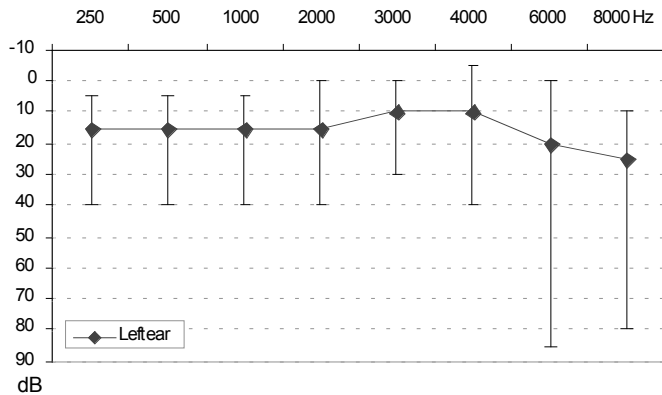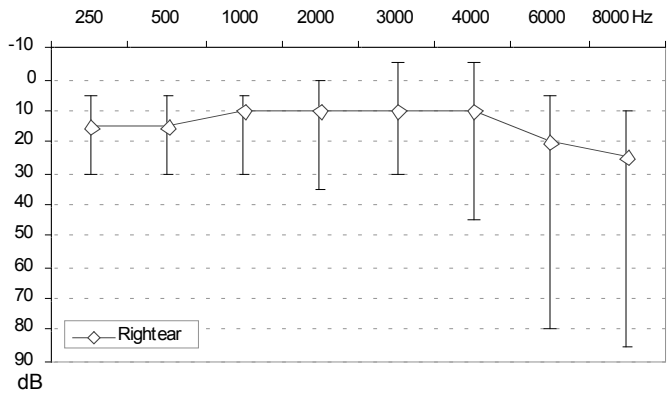

# Day 7

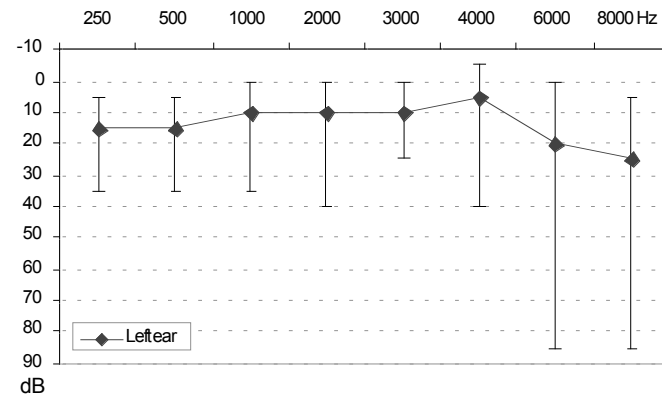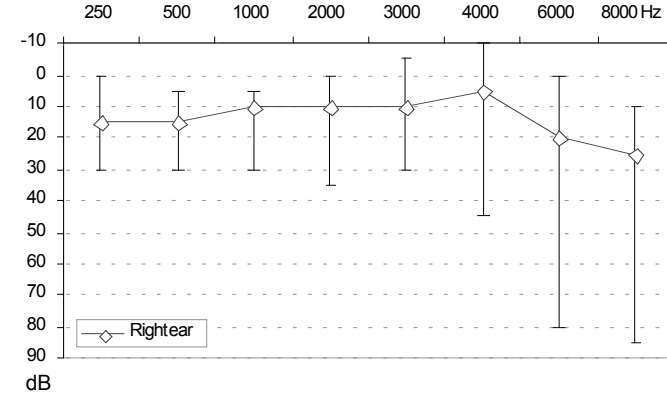

Supplement: MOESM2 [file 9548056]
